# Supplementary material for: Modulation of the Activity of Sp Transcription Factors by Mithramycin Analogues as a New Strategy for Treatment of Metastatic Prostate Cancer
Source: PubMed Central journal article supplement (PMC3334962; doi:10.1371/journal.pone.0035130), 2012-04-19
Supplement: pone.0035130.s003.pdf [file pone.0035130.s003.pdf]

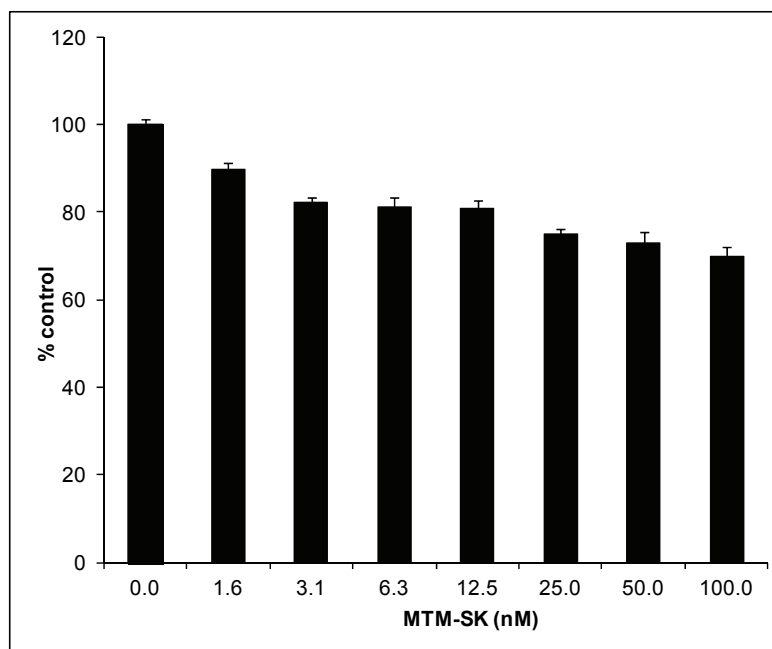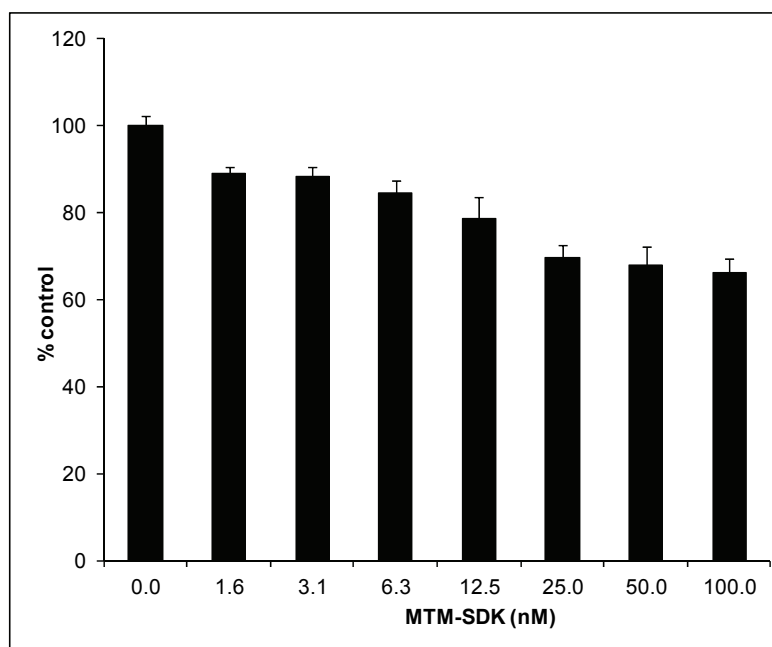

**Figure S2. Cell viability following 24-h incubation with MTM-SK and MTM-SDK.** PC3 cells were incubated with the indicated dose of the compounds or vehicle (DMSO). Cell viability was measured by the colorimetric MTT assay after 24 h. Data represent mean  $\pm$  SD of 6 replicates from two independent experiments.
