# Supplementary material for: Modulation of the Activity of Sp Transcription Factors by Mithramycin Analogues as a New Strategy for Treatment of Metastatic Prostate Cancer
Source: PubMed Central journal article supplement (PMC3334962; doi:10.1371/journal.pone.0035130), 2012-04-19
Supplement: pone.0035130.s005.pdf [file pone.0035130.s005.pdf]

**Table S1. Genes with experimental evidence of control by Sp transcription factors and implication in prostate cancer development according to analysis of recent literature**

| Gene simbol | Gene ID | References     |                    |
|-------------|---------|----------------|--------------------|
|             |         | Control by Sp1 | Implication in PCa |
| VEGFA       | 7422    | (1, 2)         | (3)                |
| MYC         | 4609    | (4)            | (5, 6)             |
| C-SRC       | 6714    | (7)            | (6, 8)             |
| hTERT       | 7015    | (9)            | (10)               |
| MCL1        | 4170    | (11)           | (12)               |
| CCND1       | 595     | (13)           | (14)               |
| CCNE1       | 898     | (15)           | (16)               |
| CLDN4       | 1364    | (17)           | (18)               |
| BIRC5       | 332     | (19)           | (20)               |
| XIAP        | 331     | (21)           | (22)               |
| MMP14       | 4323    | (23)           | (23)               |
| C-FOS       | 2353    | (24)           | (25)               |
| AR          | 367     | (26, 27)       | (27)               |
| KLK3        | 354     | (28)           | (28)               |

## References

1. Shi Q, Le X, Abbruzzese JL, et al. Constitutive Sp1 activity is essential for differential constitutive expression of vascular endothelial growth factor in human pancreatic adenocarcinoma. *Cancer Res* 2001;61:4143-54.
2. Abdelrahim M, Smith R, 3rd, Burghardt R, Safe S. Role of Sp proteins in regulation of vascular endothelial growth factor expression and proliferation of pancreatic cancer cells. *Cancer Res* 2004;64:6740-9.
3. Yao JL, Ryan CK, Francis CW, Kohli M, Taubman MB, Khorana AA. Tissue factor and VEGF expression in prostate carcinoma: a tissue microarray study. *Cancer Invest* 2009;27:430-4.
4. Parisi F, Wirapati P, Naef F. Identifying synergistic regulation involving c-Myc and sp1 in human tissues. *Nucleic Acids Res* 2007;35:1098-107.
5. Nagy B, Szendroi A, Romics I. Overexpression of CD24, c-myc and Phospholipase 2A in Prostate Cancer Tissue Samples Obtained by Needle Biopsy. *Pathol Oncol Res* 2009;15:279-83.
6. Creighton CJ. Multiple oncogenic pathway signatures show coordinate expression patterns in human prostate tumors. *PLoS ONE* 2008;3:e1816.

7. Ritchie S, Boyd FM, Wong J, Bonham K. Transcription of the human c-Src promoter is dependent on Sp1, a novel pyrimidine binding factor SPy, and can be inhibited by triplex-forming oligonucleotides. *J Biol Chem* 2000;275:847-54.
8. Lara PN, Jr., Longmate J, Evans CP, et al. A phase II trial of the Src-kinase inhibitor AZD0530 in patients with advanced castration-resistant prostate cancer: a California Cancer Consortium study. *Anticancer Drugs* 2009;20:179-84.
9. Bermudez Y, Yang H, Saunders BO, Cheng JQ, Nicosia SV, Kruk PA. VEGF- and LPA-induced telomerase in human ovarian cancer cells is Sp1-dependent. *Gynecol Oncol* 2007;106:526-37.
10. Tang J, Wang Z, Li X, Li J, Shi H. Human telomerase reverse transcriptase expression correlates with vascular endothelial growth factor-promoted tumor cell proliferation in prostate cancer. *Artif Cells Blood Substit Immobil Biotechnol* 2008;36:83-93.
11. Townsend KJ, Zhou P, Qian L, et al. Regulation of MCL1 through a serum response factor/Elk-1-mediated mechanism links expression of a viability-promoting member of the BCL2 family to the induction of hematopoietic cell differentiation. *J Biol Chem* 1999;274:1801-13.
12. Cavarretta IT, Neuwirt H, Zaki MH, et al. Mcl-1 is regulated by IL-6 and mediates the survival activity of the cytokine in a model of late stage prostate carcinoma. *Adv Exp Med Biol* 2008;617:547-55.
13. Castro-Rivera E, Samudio I, Safe S. Estrogen regulation of cyclin D1 gene expression in ZR-75 breast cancer cells involves multiple enhancer elements. *J Biol Chem* 2001;276:30853-61.
14. Bonci D, Coppola V, Musumeci M, et al. The miR-15a-miR-16-1 cluster controls prostate cancer by targeting multiple oncogenic activities. *Nat Med* 2008;14:1271-7.
15. Kim S, Kang JK, Kim YK, et al. Histone deacetylase inhibitor apicidin induces cyclin E expression through Sp1 sites. *Biochem Biophys Res Commun* 2006;342:1168-73.
16. Hashimoto Y, Naruyama H, Ando R, Okada S, Tozawa K, Kohri K. [Molecular targeted therapy for prostate cancer]. *Hinyokika Kyo* 2008;54:57-61.
17. Honda H, Pazin MJ, Ji H, Wernyj RP, Morin PJ. Crucial roles of Sp1 and epigenetic modifications in the regulation of the CLDN4 promoter in ovarian cancer cells. *J Biol Chem* 2006;281:21433-44.
18. Landers KA, Samarantunga H, Teng L, et al. Identification of claudin-4 as a marker highly overexpressed in both primary and metastatic prostate cancer. *Br J Cancer* 2008;99:491-501.
19. Chun JY, Hu Y, Pinder E, Wu J, Li F, Gao AC. Selenium inhibition of survivin expression by preventing Sp1 binding to its promoter. *Mol Cancer Ther* 2007;6:2572-80.
20. Hansen JB, Fisker N, Westergaard M, et al. SPC3042: a proapoptotic survivin inhibitor. *Mol Cancer Ther* 2008;7:2736-45.
21. Lee TJ, Jung EM, Lee JT, et al. Mithramycin A sensitizes cancer cells to TRAIL-mediated apoptosis by down-regulation of XIAP gene promoter through Sp1 sites. *Mol Cancer Ther* 2006;5:2737-46.
22. Seligson DB, Hongo F, Huerta-Yepez S, et al. Expression of X-linked inhibitor of apoptosis protein is a strong predictor of human prostate cancer recurrence. *Clin Cancer Res* 2007;13:6056-63.
23. Sroka IC, Nagle RB, Bowden GT. Membrane-type 1 matrix metalloproteinase is regulated by sp1 through the differential activation of AKT, JNK, and ERK pathways in human prostate tumor cells. *Neoplasia* 2007;9:406-17.
24. Duan R, Porter W, Safe S. Estrogen-induced c-fos protooncogene expression in MCF-7 human breast cancer cells: role of estrogen receptor Sp1 complex formation. *Endocrinology* 1998;139:1981-90.

25. Ouyang X, Jessen WJ, Al-Ahmadie H, et al. Activator protein-1 transcription factors are associated with progression and recurrence of prostate cancer. *Cancer Res* 2008;68:2132-44.
26. Wei S, Yang J, Lee SL, Kulp SK, Chen CS. PPARgamma-independent antitumor effects of thiazolidinediones. *Cancer Lett* 2009;276:119-24.
27. Husbeck B, Bhattacharyya RS, Feldman D, Knox SJ. Inhibition of androgen receptor signaling by selenite and methylseleninic acid in prostate cancer cells: two distinct mechanisms of action. *Mol Cancer Ther* 2006;5:2078-85.
28. Shin T, Sumiyoshi H, Matsuo N, et al. Sp1 and Sp3 transcription factors upregulate the proximal promoter of the human prostate-specific antigen gene in prostate cancer cells. *Arch Biochem Biophys* 2005;435:291-302.
