# Supplementary material for: Modulation of the Activity of Sp Transcription Factors by Mithramycin Analogues as a New Strategy for Treatment of Metastatic Prostate Cancer
Source: PubMed Central journal article supplement (PMC3334962; doi:10.1371/journal.pone.0035130), 2012-04-19
Supplement: pone.0035130.s006.pdf [file pone.0035130.s006.pdf]

**Supplementary Table S2. Microarrays data downloaded from GEO****(<http://www.ncbi.nlm.nih.gov/geo/>)**

---

| Tissue                                     | Samples N | GEO<br><u>DataSet</u> | Platform | References |
|--------------------------------------------|-----------|-----------------------|----------|------------|
| Normal prostate                            | 18        | GDS2545               | HG_U95A  | 4          |
| Primary tumor                              | 65        | GDS2545               | HG_U95A  | 4          |
| Metastatic tumor                           | 24        | GDS2545               | HG_U95A  | 5          |
| Treated androgen-independent primary tumor | 10        | GDS1390               | HG_U133A | 6          |
| Untreated androgen-dependent primary tumor | 10        | GDS1390               | HG_U133A | 6          |

---
