# Supplementary material for: Modulation of the Activity of Sp Transcription Factors by Mithramycin Analogues as a New Strategy for Treatment of Metastatic Prostate Cancer
Source: PubMed Central journal article supplement (PMC3334962; doi:10.1371/journal.pone.0035130), 2012-04-19
Supplement: pone.0035130.s007.pdf [file pone.0035130.s007.pdf]

**Table S3. PCR primer sets and sequences**

| <b>Quantitative RT-PCR</b>             |                     |                          |                           |
|----------------------------------------|---------------------|--------------------------|---------------------------|
| <b>Gene name</b>                       | <b>Accession No</b> | <b>Forward primer</b>    | <b>Reverse primer</b>     |
| GAPDH                                  | NM_002046.3         | ccatgttcgcatgggtgt       | ccaggggtgctaagcagtt       |
| B2M                                    | NM_004048.2         | ttctggcctggaggctatc      | tcaggaaatttgactttccattc   |
| VEGFA                                  | NM_001033756.1      | agtgtgtgccactgagga       | ggtgaggtttgatccgcata      |
| MYC                                    | NM_002467.3         | tgctccatgaggagacacc      | ctttccacagaacaacatcg      |
| C-SRC                                  | NM_198291.1         | cgagaaagtgagaccacgaa     | ttggcgttgcgaagtca         |
| hTERT                                  | NM_198255.2         | gcctcaagaccacgtc         | ccacgaactgtcgcagt         |
| MCL1                                   | NM_182763.1         | aagccaatgggcaggctct      | agaactccacaaacctcct       |
| CCND1                                  | NM_053056.2         | gaagatcgtgccacctg        | gacctcctctcgcacttct       |
| CCNE1                                  | NM_001238.1         | cctcggattattgcaccatc     | cctctctatttgcccagctc      |
| BIRC5                                  | NM_001168.2         | agaactggccttcttggga      | caagtctggctcgttctcagt     |
| XIAP                                   | NM_001167.2         | tttgggacatggatatactcagtt | agcactttactttatcaccttcacc |
| <b>Quantitative PCR of genomic DNA</b> |                     |                          |                           |
| <b>Gene name</b>                       | <b>Gene ID</b>      | <b>Forward primer</b>    | <b>Reverse primer</b>     |
| ACTB                                   | 60                  | ctgttttggcttgttcag       | aggaaaccttccctctcta       |
| B2m                                    | 12010               | ttggttgagaagcagaaaca     | cacacagtcaagttcccaaa      |
| <b>CHIP analysis</b>                   |                     |                          |                           |
| <b>Gene name</b>                       | <b>Gene ID</b>      | <b>Forward primer</b>    | <b>Reverse primer</b>     |
| VEGFA                                  | 7422                | gtccgcacgtaacctcactt     | ccaaggttcacagcctgaaa      |
| MYC                                    | 4609                | agggatcgcgctgagtataa     | tgctctcgcctggaatttact     |
| <b>RT-PCR</b>                          |                     |                          |                           |
| <b>Gene name</b>                       | <b>Accession No</b> | <b>Forward primer</b>    | <b>Reverse primer</b>     |
| GAPDH                                  | NM_002046.3         | ccatgttcgcatgggtgt       | ccaggggtgctaagcagtt       |
| SP1                                    | NM_138473.2         | ctatagcaaatgccccaggt     | tctgggctgttttctcttc       |
| SP3                                    | NM_001172712.1      | ttgcacctgtcccaactgta     | tgttgcctcttttccaaga       |
| SP4                                    | NM_003112.3         | tgaagagttgcctgttct       | tcctggttcattactgcctctt    |
